# Supplementary material for: Glycosaminoglycan Binding Facilitates Entry of a Bacterial Pathogen into Central Nervous Systems
Source: PLoS Pathog. 2011 Jun 23;7(6):e1002082. doi: 10.1371/journal.ppat.1002082 (PMC3121876; doi:10.1371/journal.ppat.1002082)
Supplement: Text S1 — Supplemental methods describing the measurement of heparan sulfate in primary mouse lung microvascular endothelial cells. (DOC) [file ppat.1002082.s007.doc]

**Supplemental Methods**

**Measurement of heparan sulfate in primary mouse lung microvascular endothelial cells.**

Cells were labeled for 24 h with 100 µCi/ml Na35SO4 in F12 nutrient mixture. Radiolabeled GAG chains were solubilized with 0.1 M NaOH for 30 min, an aliquot was removed for protein determination using the BCA protein assay (Pierce). The remaining material was adjusted to pH 7 with 10 M acetic acid and digested with a protease solution containing 1 mg/ml Pronase (Boehringer Mannheim).  After overnight incubation, the reaction mixture was diluted 5-fold with water to reduce the salt concentration to 0.1 M. The solution was applied to 0.2 ml column of DEAE-Sephacel prepared in a disposable polypropylene column. The column was washed with 20 mM sodium acetate buffer (pH 6.0) containing 0.25 M NaCl. Bound GAGs were eluted with 1 M NaCl in 20 mM sodium acetate (pH 6.0) then dialyzed into 50 mM of Ammonium Biocarbonate. The material was dried and dissolved with 200 µl of H2O. Chondroitin sulfate was removed by treating a sample overnight at 37 °C with 20 milliunits of chondroitinase ABC. The digested material was then put back onto a DEAE-Sephacel column and washed and eluted as described above. The [35S] counts in the eluent were used as a measurement of heparan sulfate in the sample.
